# Supplementary material for: Sports and Energy Drink Consumption, Oral Health Problems and Performance Impact among Elite Athletes
Source: MDPI journal article supplement (doi:10.3390/nu14235089), 2022-11-30
Supplement: s1 [file s1]

## QUESTIONNAIRE سوالنامہ

Title: Oral Health Status, Behaviors and Nutrition in Elite Pakistani Athletes

پاکستانی ایتھلیٹس میں منہ اور دانتوں کی صحت، عادات اور غذائیت

| Section 1: General Information                                                                                                                            |                                                                                                                                                                                                                                               | سیکشن 1 عمومی معلومات                         |                      |
|-----------------------------------------------------------------------------------------------------------------------------------------------------------|-----------------------------------------------------------------------------------------------------------------------------------------------------------------------------------------------------------------------------------------------|-----------------------------------------------|----------------------|
| A1: Participant code<br>شرکت کرنے والے کا کوڈ                                                                                                             | <input type="text"/> <input type="text"/> <input type="text"/> <input type="text"/>                                                                                                                                                           | A2: Participant name<br>شرکت کرنے والے کا نام | <input type="text"/> |
| A3: Phone Number<br>فون نمبر                                                                                                                              | <input type="text"/>                                                                                                                                                                                                                          | A4: Interview Date<br>انٹرویو تاریخ           | <input type="text"/> |
| A5: Gender<br>جنس                                                                                                                                         | <input type="checkbox"/> Male ----- مرد<br><input type="checkbox"/> Female ----- عورت                                                                                                                                                         | A6: Age (in years)<br>عمر سالوں میں           | <input type="text"/> |
| A7: What is your mother tongue?<br>آپ کی مادری زبان کیا ہے؟                                                                                               | <input type="checkbox"/> Pashto ----- (پشتو) <input type="checkbox"/> Hindko----- ہندکو<br><input type="checkbox"/> Punjabi----- پنجابی <input type="checkbox"/> Other specify---- دیگر وضاحت کریں                                            |                                               |                      |
| A8: What is your marital status?<br>آپ کی ازدواجی حیثیت کیا ہے؟                                                                                           | <input type="checkbox"/> Single----- غیر شادی شدہ<br><input type="checkbox"/> Married----- شادی شدہ<br><input type="checkbox"/> Other specify---- دیگر وضاحت کریں                                                                             |                                               |                      |
| A9: What is the main sports you are playing?<br>آپ کون سا کھیل کھیلتے ہیں؟                                                                                | <input type="text"/>                                                                                                                                                                                                                          |                                               |                      |
| A10: What is your athletic caliber?<br>آپ کس سطح پر کھیلتے ہیں؟                                                                                           | <input type="checkbox"/> International ----- بین الاقوامی<br><input type="checkbox"/> National----- قومی<br><input type="checkbox"/> College, University----- کالج یا یونیورسٹی<br><input type="checkbox"/> Other specify---- دیگر وضاحت کریں |                                               |                      |
| A11: How many hours do you train per week? (Approximately)<br>آپ ہفتے میں تقریباً کتنا ٹریننگ لیتے ہیں؟                                                   | <input type="text"/>                                                                                                                                                                                                                          |                                               |                      |
| A12: What is your level of education attained?<br>آپ نے کتنی تعلیم حاصل کی ہے؟                                                                            | <input type="text"/>                                                                                                                                                                                                                          |                                               |                      |
| A13: Do you have any formal nutrition study? E.g course/diploma/certificate?<br>آپ نے نیوٹریشن کے متعلق کوئی کورس لیا ہے مثلاً ڈگری سرٹیفکیٹ ڈپلومہ وغیرہ | <input type="checkbox"/> Yes----- ہاں<br><input type="checkbox"/> No----- نہیں                                                                                                                                                                |                                               |                      |
| A14: What is your monthly household income? From all sources<br>آپ کی ماہانہ آمدن کیا ہے؟                                                                 | <input type="text"/>                                                                                                                                                                                                                          |                                               |                      |
| A15: What is your occupation?<br>آپ کا پیشہ کیا ہے؟                                                                                                       | <input type="text"/>                                                                                                                                                                                                                          |                                               |                      |

| Section B: Oral health Behaviour/Practices                                                                                           |                                                                                                                                                                                                                                                                       | منہ اور دانتوں کی صحت اور عادات |  |
|--------------------------------------------------------------------------------------------------------------------------------------|-----------------------------------------------------------------------------------------------------------------------------------------------------------------------------------------------------------------------------------------------------------------------|---------------------------------|--|
| <b>B1:</b> Do you brush/clean your teeth?<br>کیا آپ دانتوں کی صفائی کرتے ہیں؟                                                        | <input type="checkbox"/> Yes----- ہاں<br><input type="checkbox"/> No----- نہیں                                                                                                                                                                                        |                                 |  |
| <b>B2:</b> How many times, do you brush your teeth every day?<br>آپ دن میں کتنی مرتبہ دانتوں کی صفائی کرتے ہیں؟                      | <input type="checkbox"/> One time----- ایک بار<br><input type="checkbox"/> Two times----- دو بار<br><input type="checkbox"/> Three or more time----- تین یا زیادہ بار                                                                                                 |                                 |  |
| <b>B3:</b> For how long, do you clean your teeth?<br>آپ دانتوں کی صفائی پر کتنا نام لیتے ہیں؟                                        | <input type="checkbox"/> One or less minute----- ایک یا ایک سے کم منٹ<br><input type="checkbox"/> Two minutes----- دو منٹ<br><input type="checkbox"/> Three or more minutes----- تین یا تین سے زیادہ                                                                  |                                 |  |
| <b>B4:</b> When do you brush your teeth?<br>آپ کس وقت دانتوں کی صفائی کرتے ہیں؟                                                      | <input type="checkbox"/> In the morning----- صبح<br><input type="checkbox"/> Afternoon----- دوپہر<br><input type="checkbox"/> Before going to bed----- رات سونے سے پہلے<br><input type="checkbox"/> Other specify----- دیگر وضاحت کریں                                |                                 |  |
| <b>B5:</b> What you use for cleaning your teeth?<br>آپ دانتوں کی صفائی کے لیے کیا چیزیں استعمال کرتے ہیں؟                            | <input type="checkbox"/> Toothbrush & toothpaste-- ٹوتھ برش ٹوتھ پیسٹ<br><input type="checkbox"/> Miswak----- مسواک<br><input type="checkbox"/> Dental floss----- ڈینٹل فلاس<br><input type="checkbox"/> Other specify----- دیگر وضاحت کریں                           |                                 |  |
| <b>B6:</b> Do you use fluoride tooth paste for cleaning teeth?<br>کیا آپ دانتوں کی صفائی کے لیے فلورائیڈ ٹوتھ پیسٹ استعمال کرتے ہیں؟ | <input type="checkbox"/> Yes----- ہاں<br><input type="checkbox"/> No----- نہیں<br><input type="checkbox"/> Don't know----- پتا نہیں                                                                                                                                   |                                 |  |
| <b>B7:</b> How often do you replace your toothbrush?<br>کتنا عرصہ بعد اپنا ٹوتھ برش تبدیل کرتے ہیں؟                                  | <input type="checkbox"/> Three months or less-- تین مہینے یا کم<br><input type="checkbox"/> 6 month----- 6 مہینے<br><input type="checkbox"/> Never until usable---- بالکل نہیں جب تک قابل استعمال ہو                                                                  |                                 |  |
| <b>B8:</b> How often do you visit dentist?<br>آپ کتنی بار دانتوں کے ڈاکٹر سے ملتے ہیں؟                                               | <input type="checkbox"/> Regularly every 6-8 months----- باقاعدہ 6-8 مہینے بعد<br><input type="checkbox"/> Occasionally----- کبھی کبھار<br><input type="checkbox"/> When I have dental pain----- جب دانت میں درد ہو<br><input type="checkbox"/> Never ----- کبھی نہیں |                                 |  |
| <b>B9:</b> When did you last visited dentist?<br>آپ آخری بار دانتوں کے ڈاکٹر سے کب ملے تھے؟                                          | <input type="checkbox"/> Last six month----- پچھلے 6 مہینے میں<br><input type="checkbox"/> Last one year----- پچھلے سال<br><input type="checkbox"/> More than a year----- ایک سال سے زیادہ                                                                            |                                 |  |
| <b>B10:</b> What was the reason for visiting dentist?<br>دانتوں کے ڈاکٹر سے ملنے کی وجہ؟                                             | <input type="checkbox"/> Dental pain----- دانتوں میں درد<br><input type="checkbox"/> Family/friend advice----- دوستوں کا مشورہ<br><input type="checkbox"/> Doctor/dentist advice----- ڈاکٹر کا مشورہ<br><input type="checkbox"/> Other specify --- دیگر وضاحت کریں    |                                 |  |
| <b>B11:</b> What are the reasons for NOT visiting the dentist?<br>دانتوں کے ڈاکٹر سے نہ ملنے کی وجہ؟                                 | <input type="checkbox"/> Expensive treatment---- علاج کے اخراجات<br><input type="checkbox"/> Unavailability of dentist--- دانتوں کے ڈاکٹر کا میسر نہ ہونا<br><input type="checkbox"/> Other specify --- دیگر وضاحت کریں                                               |                                 |  |

### Section C: Self-reported oral health

|                                                                                                                                                                                          |                                                                                                                                                                                                                                                                                                                                       |
|------------------------------------------------------------------------------------------------------------------------------------------------------------------------------------------|---------------------------------------------------------------------------------------------------------------------------------------------------------------------------------------------------------------------------------------------------------------------------------------------------------------------------------------|
| <b>C1:</b> Compared to other people, how would you describe your general health at present?<br>دوسرے لوگوں کے مقابلے میں اپنی صحت کو کس طرح دیکھتے ہیں؟                                  | <input type="checkbox"/> Very Good----- بہت اچھا<br><input type="checkbox"/> Good----- اچھا<br><input type="checkbox"/> Fair----- اوسط<br><input type="checkbox"/> Poor----- خراب<br><input type="checkbox"/> Very poor----- بہت خراب                                                                                                 |
| <b>C2:</b> How would you describe your oral health (mouth, teeth and gums) at present?<br>دوسرے لوگوں کے مقابلے میں اپنے منہ اور دانتوں کی صحت کو کیسے دیکھتے ہیں؟                       | <input type="checkbox"/> Very Good----- بہت اچھا<br><input type="checkbox"/> Good----- اچھا<br><input type="checkbox"/> Fair----- اوسط<br><input type="checkbox"/> Poor----- خراب<br><input type="checkbox"/> Very poor----- بہت خراب                                                                                                 |
| <b>C3:</b> Currently or in the past one year, do you have any problem related to your teeth? (Check all that apply)<br>ابھی یا پچھلے ایک سال کے دوران آپ کو دانتوں کا کوئی مسئلہ ہوا ہے؟ | <input type="checkbox"/> Dental pain----- دانتوں میں درد<br><input type="checkbox"/> Sensitivity to hot & cold--- دانتوں کو ٹھنڈا گرم لگنا<br><input type="checkbox"/> Gum bleeding----- مسوڑھوں سے خون آنا<br><input type="checkbox"/> Bad breath----- منہ سے بدبو آنا<br><input type="checkbox"/> Other specify --- دیگر وضاحت کریں |

### Section D: Oral health impact on psychosocial life and performance

### سماجی زندگی اور کارکردگی پر اثرات

|                                                                                                                                                                                                                                               |                                                                                                                                                                                                                                                                                                                                                                                                                                                                      |
|-----------------------------------------------------------------------------------------------------------------------------------------------------------------------------------------------------------------------------------------------|----------------------------------------------------------------------------------------------------------------------------------------------------------------------------------------------------------------------------------------------------------------------------------------------------------------------------------------------------------------------------------------------------------------------------------------------------------------------|
| <b>D1:</b> Over the past 12 months: Have you had any difficulty eating or drinking because of your mouth, teeth or gums?<br>پچھلے ایک سال کے دوران آپ کو منہ 'دانتوں یا مسوڑھوں میں تکلیف کی وجہ سے کھانے پینے میں مشکل پیش آئی ہے؟           | <input type="checkbox"/> Yes----- ہاں<br><input type="checkbox"/> No----- نہیں                                                                                                                                                                                                                                                                                                                                                                                       |
| <b>D2:</b> Over the past 12 months: Have you had any difficulty relaxing (including sleeping) because of your mouth, teeth or gums?<br>پچھلے ایک سال کے دوران آپ کو منہ 'دانتوں یا مسوڑھوں میں تکلیف کی وجہ سے آپ کے آرام میں خلل آئی ہے؟     | <input type="checkbox"/> Yes----- ہاں<br><input type="checkbox"/> No----- نہیں                                                                                                                                                                                                                                                                                                                                                                                       |
| <b>D3:</b> Have you had any difficulty smiling, laughing or showing your teeth without embarrassment?<br>کیا آپ کو بغیر شرمندگی کے مسکرانے، ہنسنے یا دانت دکھانے میں کوئی دشواری ہوئی ہے؟                                                     | <input type="checkbox"/> Yes----- ہاں<br><input type="checkbox"/> No----- نہیں                                                                                                                                                                                                                                                                                                                                                                                       |
| <b>D4:</b> Have you had any difficulties participating in normal training or competition due to problems with your mouth, teeth or gums?<br>آپ کو منہ 'دانتوں یا مسوڑھوں میں تکلیف کی وجہ سے آپ کے ٹریننگ یا مقابلے میں کبھی مشکل پیش آئی ہے؟ | <input type="checkbox"/> Full participation without any problem<br>بغیر کسی تکلیف کے ہمیشہ مکمل حصہ لیا ہے<br><input type="checkbox"/> Full participation with oral problems<br>ہمیشہ مکمل حصہ لیا ہے لیکن تکلیف کے ساتھ<br><input type="checkbox"/> Reduced participation with oral problems<br>دانتوں میں تکلیف کی وجہ سے کم حصہ لیا ہے<br><input type="checkbox"/> Could not participate due to oral problems<br>دانتوں میں تکلیف کی وجہ سے بالکل حصہ نہیں لیا ہے |
| <b>D5:</b> To what extent, you reduced your training volume due to mouth, teeth or gum disease, over the last 12 months?<br>آپ نے پچھلے 12 ماہ کے دوران منہ، دانت یا مسوڑھوں کی بیماری کی وجہ سے اپنی تربیت کا حجم کس حد تک کم کیا؟           | <input type="checkbox"/> No reduction----- کی نہیں ہے<br><input type="checkbox"/> Reduced----- کی ہے<br><input type="checkbox"/> Could not participate at all--- بالکل حصہ ہی نہیں لے سکا                                                                                                                                                                                                                                                                            |
